# Supplementary material for: Performance of Wedge-Shaped Block Armoring for Embankment Dams and Levees in a Singular Testing Facility at Quasi-Prototype Size
Source: Preprints.org preprint supplement (doi:10.20944/preprints202211.0478.v1), 2022-11-25
Supplement: Supplementary file 1 [file supplementary]

Supplementary files in https://doi.org/10.5281/zenodo.7262363
